# Supplementary material for: Chemogenomic Profiling of the Fungal Pathogen Candida albicans
Source: PubMed Central journal article supplement (PMC5786791; doi:10.1128/aac.02365-17), 2018-01-25
Supplement: AAC.02365-17_zac002186900s1.pdf [file AAC.02365-17_zac002186900s1.pdf]

Table S1 : List of Oligonucleotides used in the manuscript

| <b>Table S1</b> |                                                                                                                                    |
|-----------------|------------------------------------------------------------------------------------------------------------------------------------|
| <b>Name</b>     | <b>Sequence</b>                                                                                                                    |
| LR155F          | 5'-atttgAAAAATTCCAACAACCTTAGGg-3'                                                                                                  |
| LR155R          | 5'-aaaacCCTAAGTTGTTGGAATTTTTc-3'                                                                                                   |
| LR156F          | 5'TGATTTGGgATCcGTTTTGAATGCACAACCTGAGAAACCCCAAAAATTCCAACA<br>ACTaAtG-3'                                                             |
| LR156R          | 5'TAATCCATTATTATTATTACTAGTATTATTACTACTtCaTtAGTTGTTGGAAT<br>TTTT-3'                                                                 |
| LR157F          | 5'- GGAAGTCTTTGTAGATATAC-3'                                                                                                        |
| LR157R          | 5'- CCATTTTTGAAGGATTTAGC-3'                                                                                                        |
| LR135F          | 5'-CCATACACACACGTTAATTAG-3'                                                                                                        |
| LR135R          | 5'-GCAGTACTCTTTTTTTGGG-3'                                                                                                          |
| LR182F          | atttgGTGGCCCCTGAATTGTGTGCg*                                                                                                        |
| LR182R          | aaaacGCACACAATTCAGGGGCCACc*                                                                                                        |
| LR183F          | AGAAAGATGTTCCCGTGAAAAGTTCAACTACCGCTTGACGGTGGCCCCTtAATa<br>GTGTGC*                                                                  |
| LR183R          | AGCATTGTATTTGTAGTCGTACTCTCTGACAAACAAGCtGCACACtATTaAGGG<br>GCCAC*                                                                   |
| LR184F          | GTGTTGGAGAATAGACAGCG                                                                                                               |
| LR184R          | GCGGGTACATTCATTGTTGG                                                                                                               |
| NPY1-S1         | CCACCAAAAAAAAAAATATTTTTCTCTTTCTATTTTAAACATAGCTGCAATTTTTATTT<br>CAACTGTTCTTTCTTTCTTTCTTTCTTTGCTCTTCTTTGTGaagcttcgtacgctgcag<br>gtc* |
| NPY1-exF        | AAAACCTATTGACTTAAACTC                                                                                                              |
| NPY1-S2         | CTAAATTTTTTTTTTTTGCAGCAAAAAGTTGAAAAAAGAAAAAGAACTCTTAAAA<br>CAACTCTAATGTATTTAATAATAATCTATCTCCTGTTCTACTctgatcatcgaatt<br>cgag*       |
| NPY1-exR        | ATTTTAAACAAACTGATTT                                                                                                                |
| X2-CaHIS1       | CAACGAAATGGCCTCCCCTACCACAG                                                                                                         |
| X3-CaHIS1       | GGACGAA TTGAAGAAAGCTGGTGCACCG                                                                                                      |
| X2-CaARG4       | AAT GGA TCA GTG GCA CCG GTG                                                                                                        |
| X3-CaARG4       | GAGGAGTACGACCTCAAGCGC                                                                                                              |

(Table S2 in Excel format separately)

**Table S3:** In general the larger chromosomes (R, 1 and 2) show higher frequencies of LOH than the smaller chromosomes (5 and 6):

**Table S3: Loss of heterozygosity (LOH) is co-related with the size of chromosomes, larger chromosomes showing higher frequencies of LOH.**

|                            | <b>Chr1</b> | <b>Chr2</b> | <b>Chr3</b> | <b>Chr4</b> | <b>Chr5</b> | <b>Chr6</b> | <b>Chr7</b> | <b>ChrR</b> |
|----------------------------|-------------|-------------|-------------|-------------|-------------|-------------|-------------|-------------|
| <b>Distribution of LOH</b> | 3.40%       | 4.15%       | 2.50%       | 3.00%       | 1.30%       | 1.20%       | 2.50%       | 4.00%       |
| <b>Chromosome Size</b>     | 3.2         | 2.2         | 1.8         | 1.6         | 1.2         | 1           | 0.95        | 2.5         |

**Table S4: Lists of Genes common to the three species examined with different drug sensitivities:**

**Caspofungin Sensitivity:**

|                                                                                                            |
|------------------------------------------------------------------------------------------------------------|
| <p><b>Genes common to <i>S.cerevisiae</i>,<br/><i>C.albicans</i> and <i>C.glabrata</i></b></p> <p>MNT2</p> |
|------------------------------------------------------------------------------------------------------------|

| <b>Genes Common to <i>C.albicans</i> and <i>S.cerevisiae</i></b> | <b>Genes common to <i>S.cerevisiae</i> and <i>C.glabrata</i></b> | <b>Genes common to <i>C.albicans</i> and <i>C.glabrata</i></b> |
|------------------------------------------------------------------|------------------------------------------------------------------|----------------------------------------------------------------|
| <p>SAC7<br/>VPS24<br/>BSD2<br/>GOS1<br/>SWI4<br/>CAT20/STE20</p> | <p>BCK1<br/>ADA2<br/>MKC1</p>                                    | <p>CCH1<br/>HEK2<br/>SIP3</p>                                  |

**Fluconazole Sensitive:**

|                                                                                                            |
|------------------------------------------------------------------------------------------------------------|
| <p><b>Genes common to <i>S.cerevisiae</i>,<br/><i>C.albicans</i> and <i>C.glabrata</i></b></p> <p>None</p> |
|------------------------------------------------------------------------------------------------------------|

| <b>Genes Common to <i>C.albicans</i> and <i>S.cerevisiae</i></b> | <b>Genes common to <i>S.cerevisiae</i> and <i>C.glabrata</i></b> | <b>Genes common to <i>C.albicans</i> and <i>C.glabrata</i></b> |
|------------------------------------------------------------------|------------------------------------------------------------------|----------------------------------------------------------------|
| <p>RPN4</p>                                                      | <p>None</p>                                                      | <p>None</p>                                                    |

### Amphotericin B Sensitivity:

**Genes common to *S.cerevisiae*,  
*C.albicans* and *C.glabrata***

MNT2

| <b>Genes Common to <i>C.albicans</i> and <i>S.cerevisiae</i></b>                                        | <b>Genes common to <i>S.cerevisiae</i> and <i>C.glabrata</i></b> | <b>Genes common to <i>C.albicans</i> and <i>C.glabrata</i></b> |
|---------------------------------------------------------------------------------------------------------|------------------------------------------------------------------|----------------------------------------------------------------|
| ATG15<br>RNH70<br>TPS1<br>MTG2<br>YUR1<br>RIT1<br>RBK1<br>POR1<br>ALG8<br>AYR1<br>HOG1<br>MNN10<br>LEN3 | SSD1<br>DEP1<br>CWH41                                            | None                                                           |

**Table S5: Lists of *C.albicans* strains used**

| Name of Strain | Genotype                                           |
|----------------|----------------------------------------------------|
| CaSS1          | his3::hisG/his3::hisG leu2::tetR-GAL4AD-URA3/LEU2  |
| SN148          | arg4Δ/arg4Δ, leu2Δ/leu2Δ, his1Δ/his1Δ, ura3Δ/ura3Δ |
| SN76           | arg4Δ/arg4Δ, his1Δ/his1Δ, ura3Δ/ura3Δ              |

Table S6 and S7 are in Excel Format

Supplementary **Figure S1:**

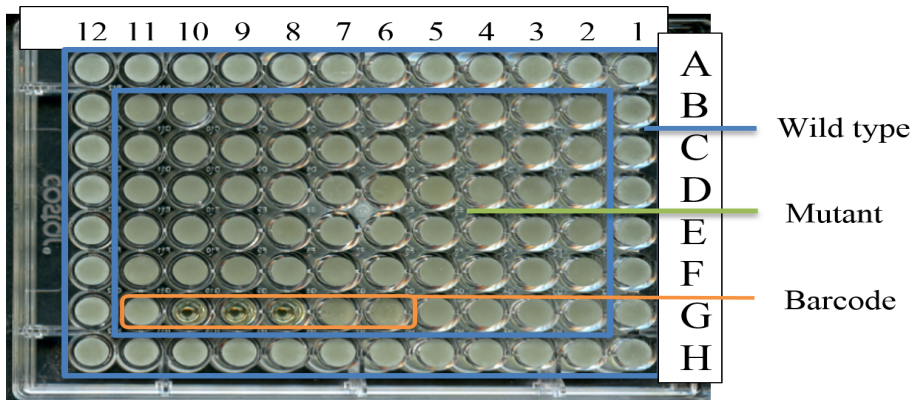

**Fig. S1:** A plate from Grace V1.0 collection showing the distribution of the strains in it. All the edges are occupied by the wild type parent strain CaSS1 (WT), and each plate has a unique barcode in the last 6 inner wells (G6 to G11) consisting of various patterns of CaSS1 and the morphologically distinct mutant *dig1/dig1*

Supplementary Figure S2:

**Echinocandins**

Dose Response Curve for Caspofungin Sensitive strains

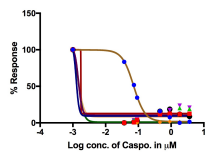

Dose Response Curve for Caspofungin Resistant strains

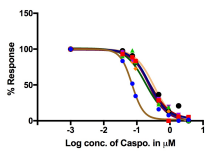

Dose Response Curve for Anidulafungin Sensitive Strains

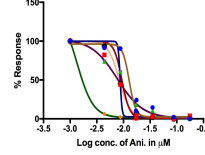

Dose Response Curve for Anidulafungin Resistant Strains

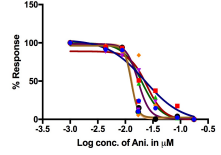

**Azoles**

Dose Response Curve for Fluconazole Sensitive Strains

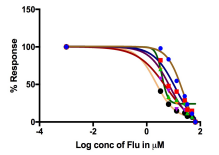

Dose Response Curve for Fluconazole Resistant Strains

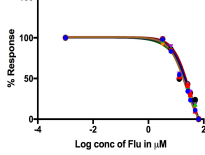

Dose Response Curve for Posaconazole Sensitive Strains

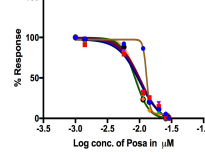

Dose Response Curve for Posaconazole Resistant Strains

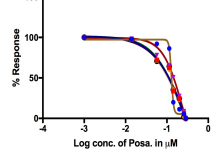

**Polyenes**

Dose Response Curve for Amphotericin B Sensitive Strains

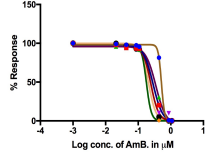

**Pyridine Amides**

Dose Response Curve for GPI-C107 Sensitive Strains

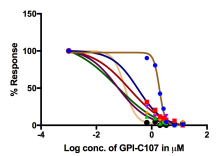

Dose Response Curve for GPI-C107 Resistant Strains

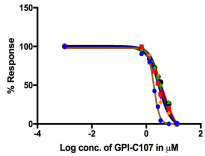

Dose Response Curve for GPI-Ly7 Sensitive Strains

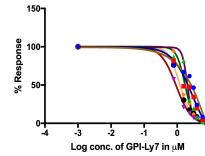

Dose Response Curve for GPI-Ly7 Resistant Strains

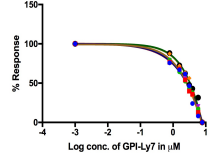

Fig S2: Dose response curves for the different drugs
